# Supplementary material for: Green and size-controllable synthesis of photoluminescent carbon nanoparticles from waste plastic bags
Source: Royal Society of Chemistry journal article supplement (doi:10.1039/c4ra08306g), 2014-01-01
Supplement: c4ra08306g1.pdf [file c4ra08306g1.pdf]

## Electronic Supplementary Information (ESI)

### Green and size-controllable synthesis of photoluminescent carbon nanoparticles from waste plastic bags

Yaoping Hu,<sup>a</sup> Jing Yang,<sup>a,b</sup> Jiangwei Tian,<sup>a</sup> Li Jia,<sup>a</sup> and Jun-Sheng Yu<sup>\*a</sup>

<sup>a</sup> State Key Laboratory of Analytical Chemistry for Life Science, School of Chemistry and Chemical Engineering, Nanjing University, Nanjing 210093, P.R. China

<sup>b</sup> School of Pharmacy, Nanjing Medical University, Nanjing 210029, P.R. China

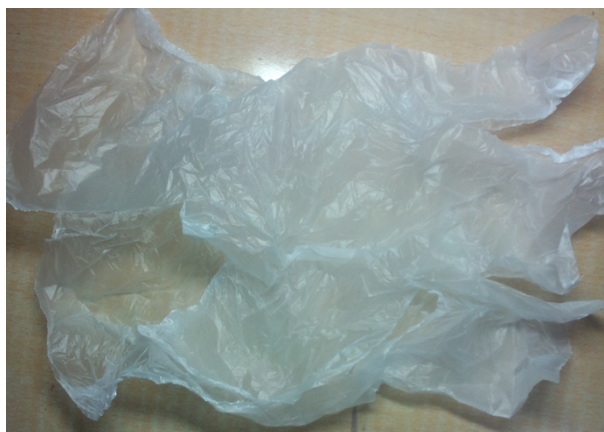

**Fig. S1** The photograph of the WPBs used in the first case for the synthesis of CNPs.

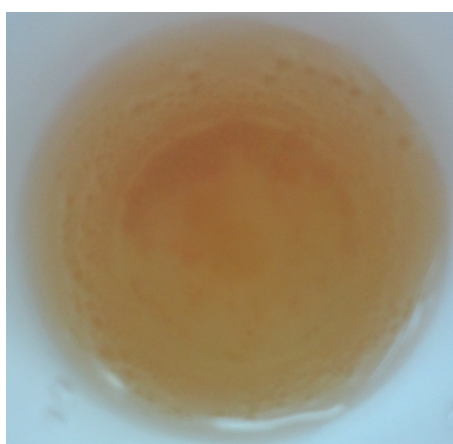

**Fig. S2** The products of WPBs which were hydrothermally treated in 5.0 wt% H<sub>2</sub>O<sub>2</sub> solution at 180 °C for 12 h. Note that many bubbles generated and adhered to the wall of the autoclave.

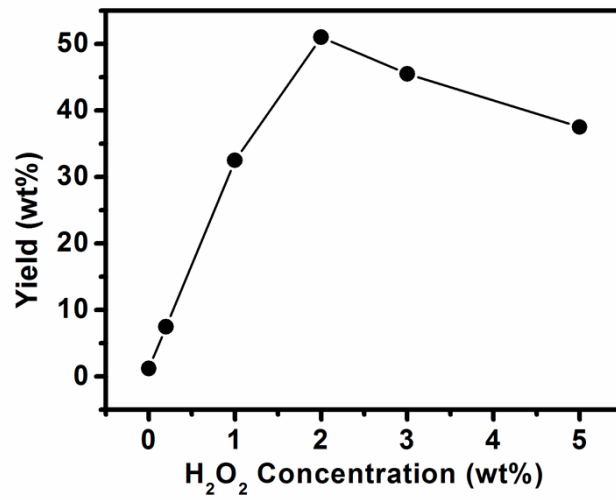

**Fig. S3** The yields of CNPs synthesized in different concentrations of H<sub>2</sub>O<sub>2</sub> solution.

$$(\text{Yield}_{(\text{CNPs})} = \text{Weight}_{(\text{CNPs})} / \text{Weight}_{(\text{WPBs})})$$

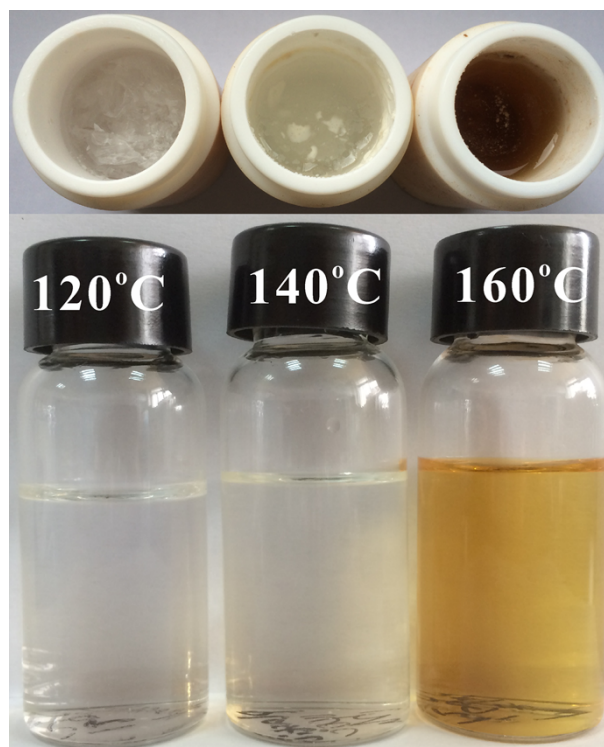

**Fig. S4** The products of WPBs which were hydrothermally treated in 2.0 wt% H<sub>2</sub>O<sub>2</sub> solution at different temperature (from left to right: 120, 140, 160 °C) for 12 h, and the corresponding centrifuged solutions.

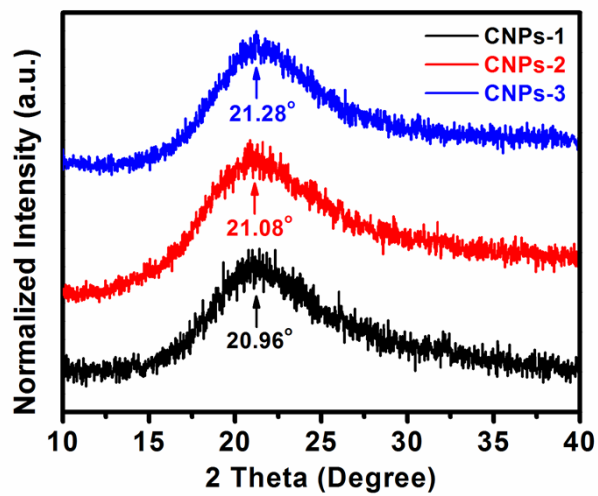

Fig. S5 XRD patterns of CNPs-1, CNPs-2, and CNPs-3.

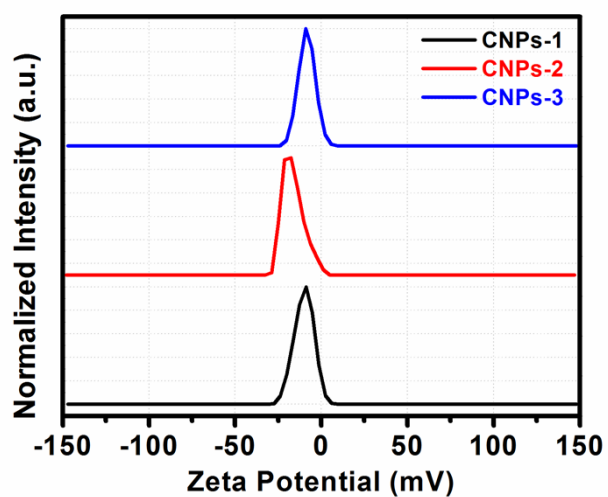

Fig. S6 Zeta Potentials of CNPs-1, CNPs-2, and CNPs-3.

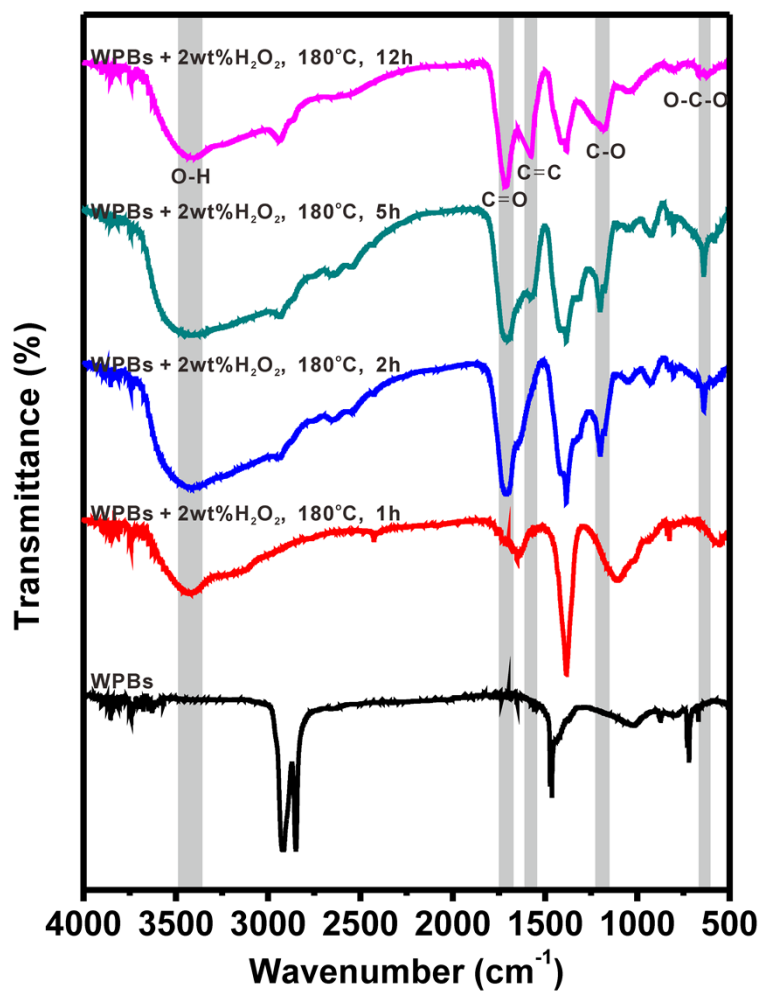

**Fig. S7** FTIR spectra of WPBs, intermediate products obtained at different reaction time (1, 2, 5 h), and the final CNPs.

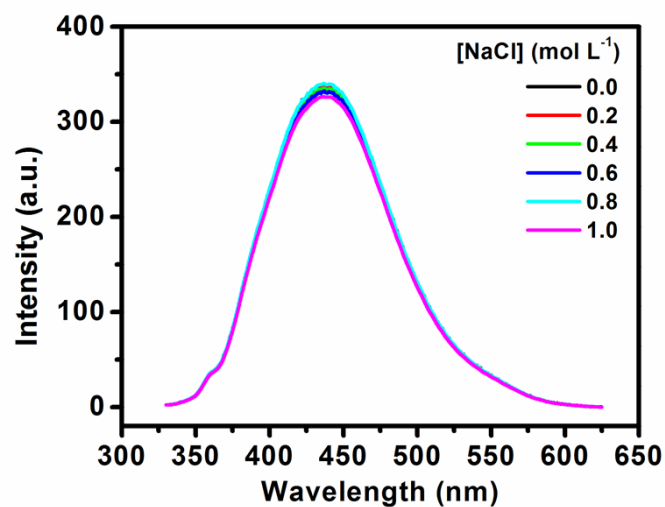

**Fig. S8** Effect of concentration of NaCl on the PL intensity of CNPs-2.

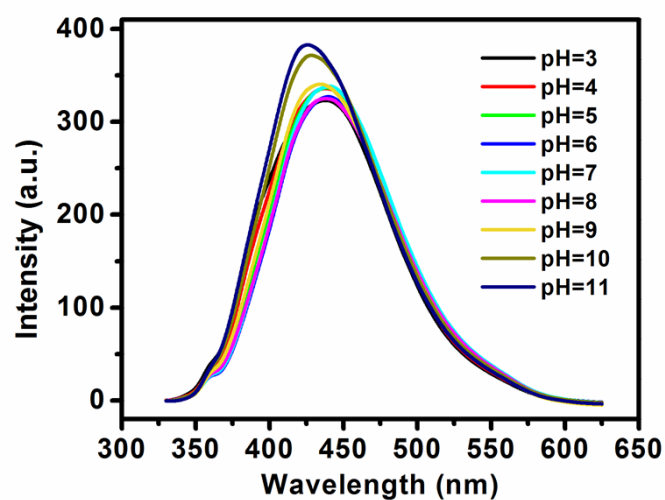

**Fig. S9** Effect of pH on the PL intensity of CNPs-2.

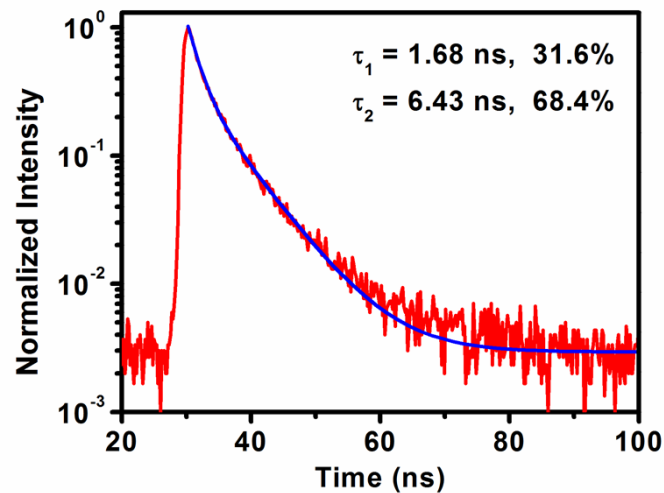

Fig. S10 Fluorescence lifetime of CNPs-2.

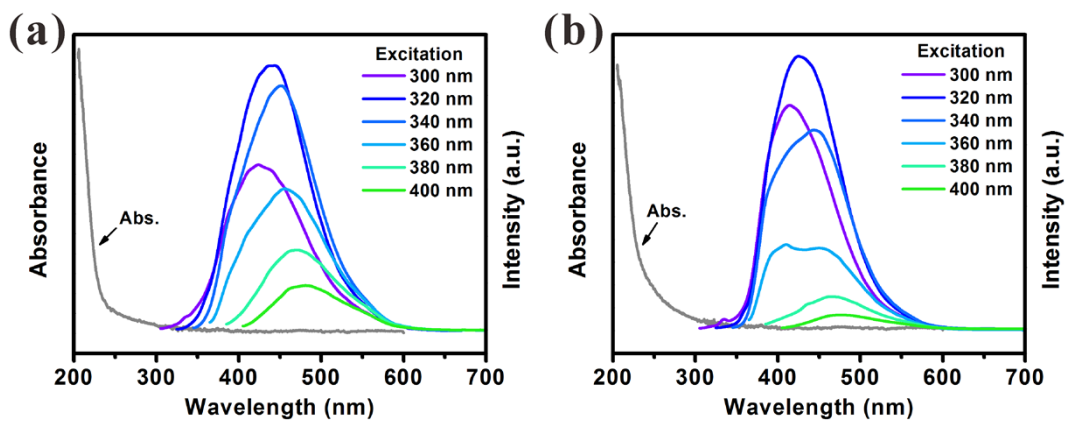

Fig. S11 UV-vis absorption and PL spectra of (a) CNPs-1 and (b) CNPs-3.

**Table S1** Elemental analysis of the starting WPBs, production yield and quantum yield of the CNPs.

| WPBs                                 | Elemental analysis |         | CNPs                   |                   |
|--------------------------------------|--------------------|---------|------------------------|-------------------|
|                                      | C (wt%)            | H (wt%) | Production Yield (wt%) | Quantum Yield (%) |
| (a) syringe-packing plastic bag      | 87.17              | 13.02   | 48.1                   | 2.25              |
| (b) food fresh-keeping plastic bag * | 29.62              | 3.32    | 10.7                   | 1.18              |
| (c) garbage plastic bag              | 79.96              | 13.04   | 49.5                   | 2.38              |
| (d) soap-packing plastic bag         | 79.05              | 12.98   | 26.8                   | 4.49              |
| (e) stationery-carrying plastic bag  | 81.73              | 13.80   | 52.3                   | 2.03              |
| (f) toilet roll-packing plastic bag  | 87.48              | 13.30   | 34.8                   | 1.66              |

\* Food fresh-keeping plastic bag is made of polyvinylidene chloride

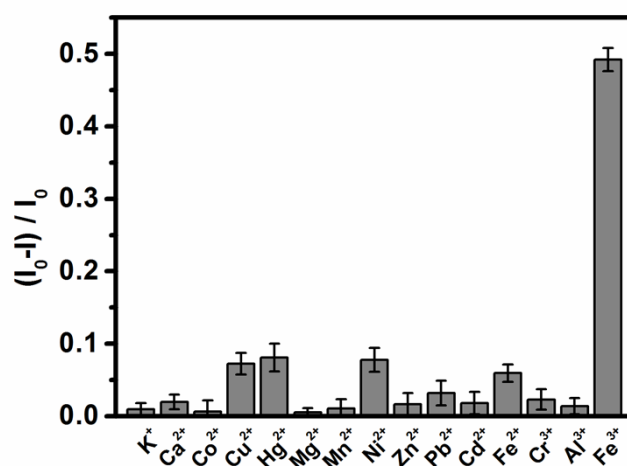

**Fig. S12** Selectivity of CNPs-2 toward Fe<sup>3+</sup>. All the concentrations of the metal ions were 400 μM. All experiments were performed in a pH 7.0 solution; excitation wavelength = 320 nm.

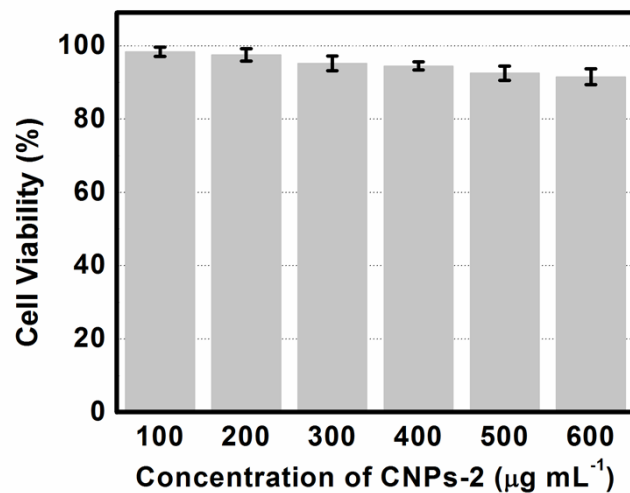

**Fig. S13** Cell viability values (%) estimated by MTT assay in HeLa cells, which are incubated with serial concentrations of CNPs-2 for 48 h at 37 °C.

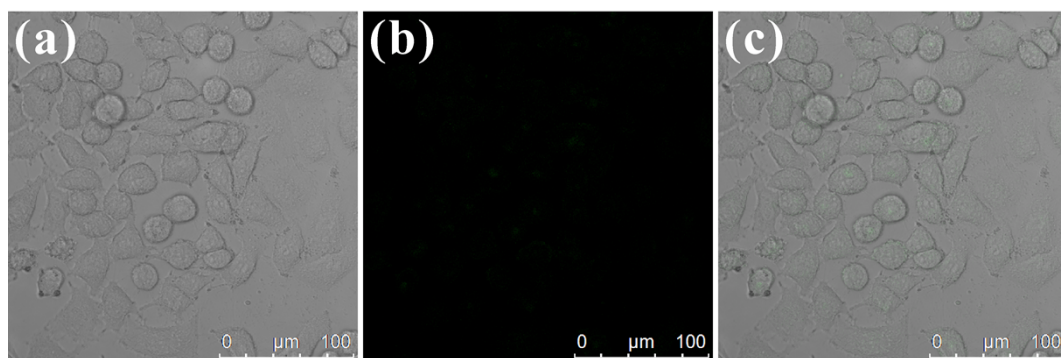

**Fig. S14** (a) A Bright-field microphotograph of HeLa cells. (b) A confocal fluorescence microphotograph of HeLa cells in the absence of CNPs ( $\lambda_{\text{ex}} = 405 \text{ nm}$ ). (c) An overlay image of (a) and (b).
